# Supplementary material
Source: Royal Society of Chemistry journal article supplement (doi:10.1039/d6se00383d)
Supplement: d6se00383d1.pdf [file d6se00383d1.pdf]

Highly Active Pd-Doped ZnCo<sub>2</sub>Se<sub>4</sub> Spinel Nano-electrocatalysts For Synergistic Hydrogen Evolution and Methanol/Urea-Oxidation–assisted Water Splitting Validated by DFT  
Mai Almohaimeed<sup>a</sup>, Refah Saad Alkhaldi<sup>b</sup>, Mohammed Ashraf Gondal<sup>c,d\*</sup>, Munirah Abdullah Almessiere<sup>e,f\*</sup>, Mohamed Jaffer Sadiq Mohamed<sup>c,d</sup>, Abdulhadi Baykal<sup>g</sup>, Serkan Caliskan<sup>h</sup>

<sup>a</sup>*Department of Physics, College of Science, Qassim University, Buraidah 51452, Saudi Arabia*

<sup>b</sup>*Science Department, Prince Sultan Military College of Health Sciences, P.O. Box 649, 23913 Dhahran, Saudi Arabia.*

<sup>c</sup>*Laser Research Group, Department of Physics, King Fahd University of Petroleum & Minerals (KFUPM), KFUPM Box 5040, 31261 Dhahran, Saudi Arabia.*

<sup>d</sup>*Interdisciplinary Research Center for Hydrogen Technologies and Carbon Management (IRC-HTCM), King Fahd University of Petroleum & Minerals (KFUPM), KFUPM Box 5040, 31261 Dhahran, Saudi Arabia.*

<sup>e</sup>*Department of Physics, College of Science, Imam Abdulrahman Bin Faisal University, P.O. Box 1982, 31441 Dammam, Saudi Arabia.*

<sup>f</sup>*Department of Biophysics, Institute for Research and Medical Consultations (IRMC), Imam Abdulrahman Bin Faisal University, P.O. Box 1982, 31441 Dammam, Saudi Arabia.*

<sup>g</sup>*Istanbul Aydin University, Food Engineering Department; Faculty of Engineering, 34295 Istanbul, Türkiye.*

<sup>h</sup>*Department of Mathematical, Applied, and Physical Sciences, University of Houston-Clear Lake, 77058 TX Houston, USA.*

Corresponding authors' email addresses: magondal@kfupm.edu.sa (M.A. Gondal) and  
malmessiere@iau.edu.sa (M.A. Almessiere)

### 2.3. Electrochemical Measurements

Electrochemical measurements were performed in a standard three-electrode configuration using 1 M KOH as the alkaline electrolyte (pH 13.6). An Ag/AgCl electrode containing saturated 3 M KCl served as the reference electrode, a platinum wire was employed as the counter electrode, and the catalyst-coated nickel foam acted as the working electrode. The in situ-prepared catalyst is denoted as  $ZnPd_xCo_{2-x}Se_4(x \leq 0.08)@NF$ . All electrochemical experiments were conducted at room temperature ( $\sim 25$  °C) using a Metrohm Autolab PGSTAT302N workstation.

Hydrogen evolution activity was evaluated by linear sweep voltammetry in 1 M KOH over a potential window from 0.00 to  $-0.06$  V versus the reversible hydrogen electrode (RHE) at a scan rate of 10 mV/s. The open-circuit potential was first recorded to define the operational potential range for cyclic voltammetry, with the optimal alignment observed for the composition with  $x = 0.06$ . Cyclic voltammograms were collected within the non-faradaic region between  $-0.015$  and  $-0.026$  V at scan rates ranging from 40 to 200 mV/s.

The electrochemically active surface area of each electrode was estimated from the double-layer capacitance values extracted from the CV curves, assuming a specific capacitance of  $40 \mu\text{F}/\text{cm}^2$  in 1 M KOH. Electrochemical impedance spectroscopy was employed to investigate interfacial charge-transfer and mass-transport characteristics by analyzing the charge-transfer resistance ( $R_{ct}$ ) at suitable applied potentials. Impedance spectrum was acquired across a frequency range of 0.01 Hz to 100 kHz. Tafel slopes were calculated from the polarization data to identify the dominant hydrogen evolution pathway, including Volmer, Volmer-Tafel, or Volmer-Heyrovsky mechanisms. Long-term stability of the optimal catalyst composition ( $x = 0.06$ ) was evaluated using chronopotentiometric measurements.

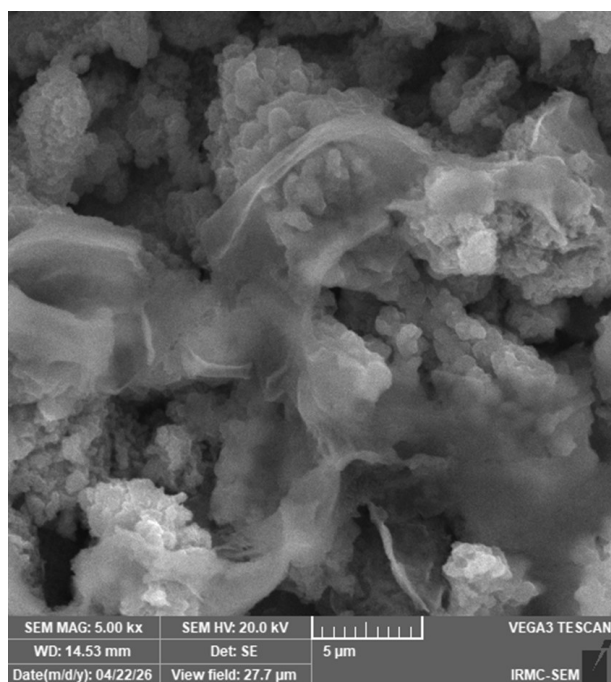

**Figure S1.** SEM Image of  $ZnPd_xCo_{2-x}Se_4@NF$  ( $x = 0.06$ ) nanoelectrocatalysts states after the stability tests.

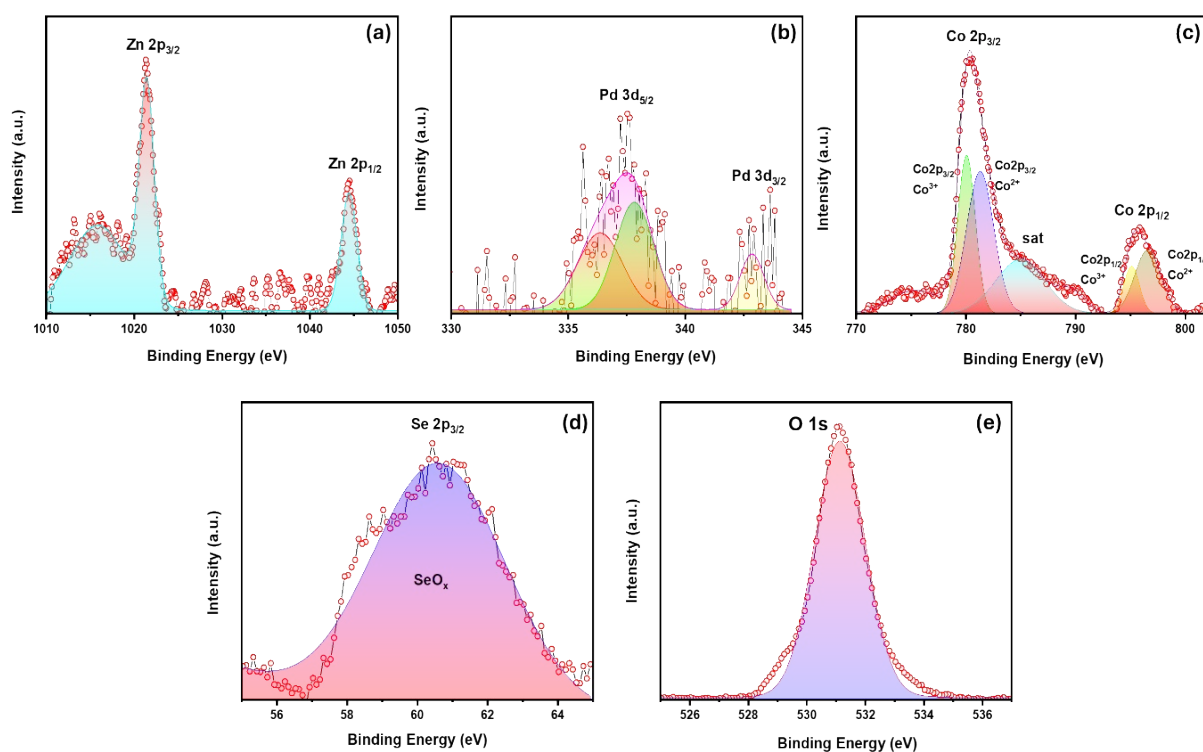

**Figure S2.** XPS high-resolution spectra of  $ZnPd_xCo_{2-x}Se_4@NF$  ( $x = 0.06$ ) nanoelectrocatalysts. (a) Zn 2p, (b) Pd 3d, (c) Co 2p, (d) Se 2p, and (e) O 1s states after the stability tests.

**Table S1.** Comparison of HER performance with reported catalysts.

| <b>Electrocatalyst</b>                                      | <b>HER Overpotential<br/>at 10 mA/cm<sup>2</sup></b> | <b>Electrolyte</b>      | <b>Reference</b> |
|-------------------------------------------------------------|------------------------------------------------------|-------------------------|------------------|
| ReSe <sub>2</sub> /NiSe                                     | 111 mV                                               | Alkaline media of pH~14 | [1]              |
| Ni <sub>x</sub> Se <sub>y</sub>                             | 225 mV                                               | 1M KOH                  | [2]              |
| Fe <sub>0.2</sub> Ni <sub>0.8</sub> Se                      | 124 mV                                               | 1M KOH                  | [2]              |
| CoSe <sub>2</sub> /MoSe <sub>2</sub>                        | 90 mV                                                | 1M KOH                  | [3]              |
| NiSe <sub>2</sub>                                           | 316 mV                                               | Alkaline media          | [4]              |
| <b>ZnPd<sub>0.06</sub>Co<sub>1.94</sub>O<sub>4</sub>@NF</b> | <b>~64 mV</b>                                        | <b>1M KOH</b>           | <b>This work</b> |

### References

- [1] S. Zhen et al., Selenide heterostructure ReSe<sub>2</sub>/NiSe as a pH-universal catalyst for efficient hydrogen evolution reaction, *Int. J. Hydrogen Energy*, 113, 2025, 312–321. DOI: 10.1016/j.ijhydene.2025.02.473.
- [2] J. He, T. Qian, C. Cai, X. Xiang, S. Li, and X. Zu, Nickel-based selenides with a fractal structure as an excellent bifunctional electrocatalyst for water splitting, *Nanomaterials*, 12(2), 2022, 281. DOI: 10.3390/nano12020281.
- [3] L. Xia et al., Hierarchical 0D–2D Co/Mo selenides as superior bifunctional electrocatalysts for overall water splitting, *Front. Chem.*, 8, 2020. DOI: 10.3389/fchem.2020.00382.
- [4] P. P. Sanap et al., Hydrothermally modulated Ni selenide to Ni–Cu selenide catalyst for enhanced alkaline electrocatalytic water splitting, *Int. J. Hydrogen Energy*, 206, 2026, 153343. DOI: 10.1016/j.ijhydene.2025.153343.
